# Supplementary material for: Frailty and patient-reported outcomes in subjects with chronic obstructive pulmonary disease: are they independent entities?
Source: PubMed Central journal article supplement — BMJ Open Respir Res. 2017 Jul 3;4(1):e000196. doi: 10.1136/bmjresp-2017-000196 (PMC5531303; doi:10.1136/bmjresp-2017-000196), 2017-07-03
Supplement: bmjresp-2017-000196supp001.pdf [file bmjresp-2017-000196supp001.pdf]

Supplementary Table 1 The Kihon Checklist.

| No. Questions                                                                                                | Answer                          |                                |
|--------------------------------------------------------------------------------------------------------------|---------------------------------|--------------------------------|
| 1 Do you go out by bus or train by yourself?                                                                 | <input type="checkbox"/> 0. YES | <input type="checkbox"/> 1. NO |
| 2 Do you go shopping to buy daily necessities by yourself?                                                   | <input type="checkbox"/> 0. YES | <input type="checkbox"/> 1. NO |
| 3 Do you manage your own deposits and savings at the bank?                                                   | <input type="checkbox"/> 0. YES | <input type="checkbox"/> 1. NO |
| 4 Do you sometimes visit your friends?                                                                       | <input type="checkbox"/> 0. YES | <input type="checkbox"/> 1. NO |
| 5 Do you turn to your family or friends for advice?                                                          | <input type="checkbox"/> 0. YES | <input type="checkbox"/> 1. NO |
| 6 Do you normally climb stairs without using handrail or wall for support?                                   | <input type="checkbox"/> 0. YES | <input type="checkbox"/> 1. NO |
| 7 Do you normally stand up from a chair without any aids?                                                    | <input type="checkbox"/> 0. YES | <input type="checkbox"/> 1. NO |
| 8 Do you normally walk continuously for 15 minutes?                                                          | <input type="checkbox"/> 0. YES | <input type="checkbox"/> 1. NO |
| 9 Have you experienced a fall in the past year?                                                              | <input type="checkbox"/> 0. YES | <input type="checkbox"/> 1. NO |
| 10 Do you have a fear of falling while walking?                                                              | <input type="checkbox"/> 0. YES | <input type="checkbox"/> 1. NO |
| 11 Have you lost 2 kg or more in the past 6 months?                                                          | <input type="checkbox"/> 0. YES | <input type="checkbox"/> 1. NO |
| 12 Height: cm, weight: kg, BMI: kg/m <sup>2</sup> If BMI is less than 18.5, this item is scored.             | <input type="checkbox"/> 0. YES | <input type="checkbox"/> 1. NO |
| 13 Do you have any difficulties eating tough foods compared to 6 months ago?                                 | <input type="checkbox"/> 0. YES | <input type="checkbox"/> 1. NO |
| 14 Have you choked on your tea or soup recently?                                                             | <input type="checkbox"/> 0. YES | <input type="checkbox"/> 1. NO |
| 15 Do you often experience having a dry mouth?                                                               | <input type="checkbox"/> 0. YES | <input type="checkbox"/> 1. NO |
| 16 Do you go out at least once a week?                                                                       | <input type="checkbox"/> 0. YES | <input type="checkbox"/> 1. NO |
| 17 Do you go out less frequently compared to last year?                                                      | <input type="checkbox"/> 0. YES | <input type="checkbox"/> 1. NO |
| 18 Do your family or your friends point out your memory loss? e.g. "You ask the same question over and over" | <input type="checkbox"/> 0. YES | <input type="checkbox"/> 1. NO |
| 19 Do you make a call by looking up phone numbers?                                                           | <input type="checkbox"/> 0. YES | <input type="checkbox"/> 1. NO |
| 20 Do you find yourself not knowing today's date?                                                            | <input type="checkbox"/> 0. YES | <input type="checkbox"/> 1. NO |
| 21 In the last 2 weeks have you felt a lack of fulfilment in your daily life?                                | <input type="checkbox"/> 0. YES | <input type="checkbox"/> 1. NO |
| 22 In the last 2 weeks have you felt a lack of joy when doing the things you used to enjoy?                  | <input type="checkbox"/> 0. YES | <input type="checkbox"/> 1. NO |
| 23 In the last 2 weeks have you felt difficulty in doing what you could do easily before?                    | <input type="checkbox"/> 0. YES | <input type="checkbox"/> 1. NO |
| 24 In the last 2 weeks have you felt helpless?                                                               | <input type="checkbox"/> 0. YES | <input type="checkbox"/> 1. NO |
| 25 In the last 2 weeks have you felt tired without a reason?                                                 | <input type="checkbox"/> 0. YES | <input type="checkbox"/> 1. NO |

BMI, body mass index
